# Supplementary material for: Early ERK1/2 activation promotes DRP1-dependent mitochondrial fission necessary for cell reprogramming
Source: PubMed Central journal article supplement (PMC4821885; doi:10.1038/ncomms11124), 2016-03-31
Supplement: ncomms11124-s1.pdf [file ncomms11124-s1.pdf]

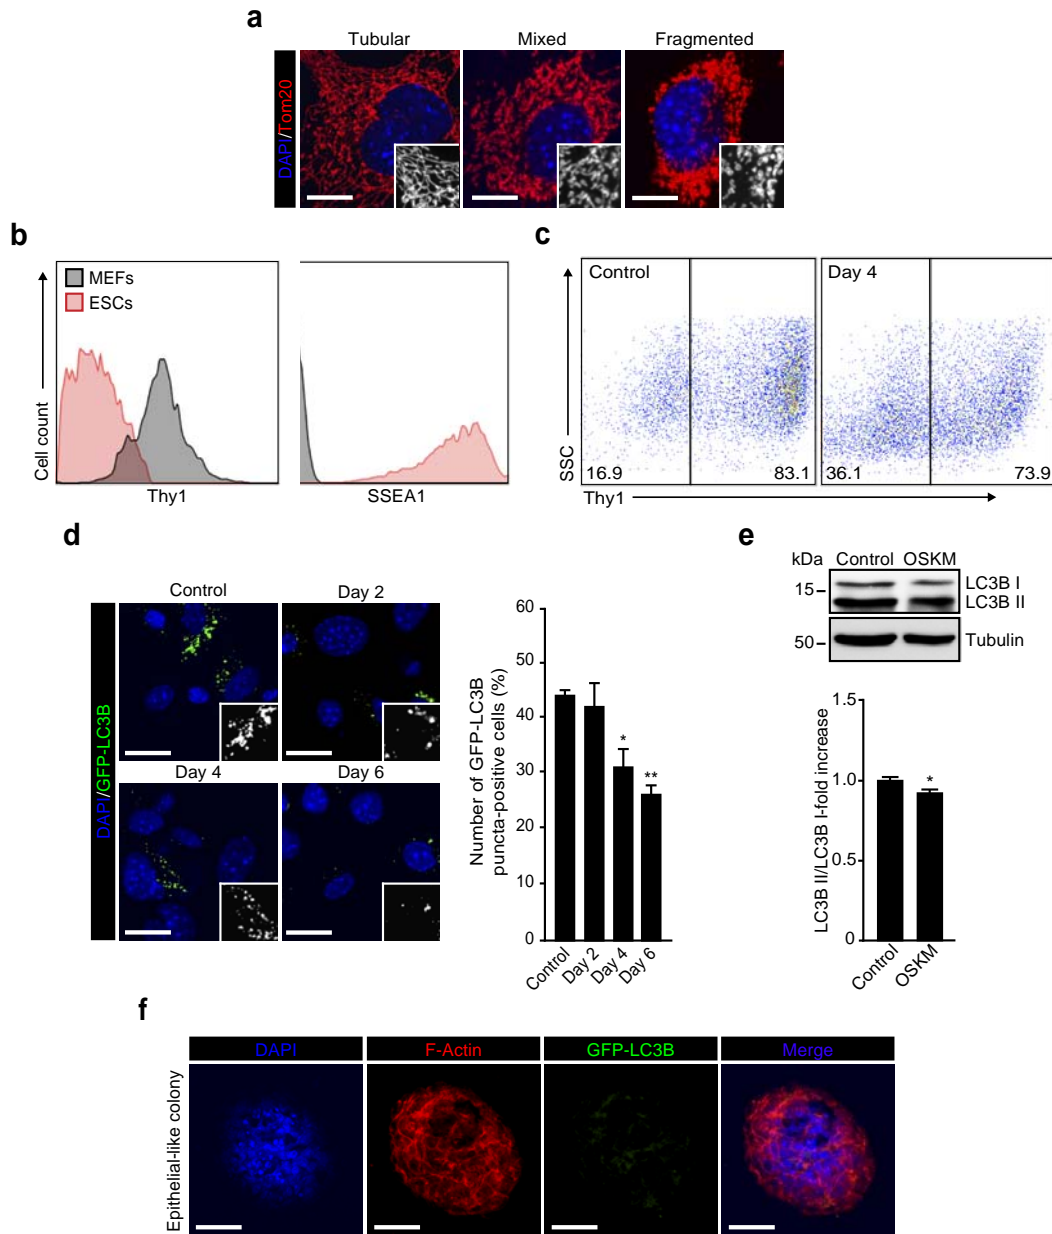

**Supplementary Figure 1. Epithelial-like colonies are negative for autophagic markers.** (a) Representative confocal images of wild type MEFs stained with anti-Tom20 antibody (red) illustrating the different mitochondrial morphologies observed in the cultures. Insets show a black and white magnification of the pictures. DAPI (blue) was used as a nuclear counterstaining. Scale bar, 12  $\mu$ m. (b) Histograms showing the expression of the indicated markers in MEFs (gray) or ES cells (ESCs, red) assessed by flow cytometry. (c) Dot plots showing the expression of Thy1 in MEFs before (Control) or 4 days after OSKM expression. Percentages of the Thy1-negative and -positive are shown at the bottom of the dot plots. SSC, Side Scatter. (d) GFP-LC3B-expressing MEFs were mock- or OSKM-infected. At the

indicated days cells were treated during 4 hours with 50  $\mu$ M Chloroquine and then processed for IF. Representative confocal images on the left show cells positive for GFP-LC3B puncta (green). Insets show a black and white magnification of the pictures. DAPI (blue) was used as a nuclear counterstaining. Scale bars, 24  $\mu$ m. Graph on the right shows the quantification of cells positive for GFP-LC3B puncta before or at the indicated days after OSKM expression (n = 3). (e) Lysates of MEFs control or OSKM-infected were analysed by immunoblotting using the indicated antibodies. Graph on the right shows the quantification of the data (n = 3). (f) GFP-LC3B-expressing MEFs were mock- or OSKM-infected and eight days post-infection cells were treated during 4 hours with 50  $\mu$ M Chloroquine and then processed for immunofluorescence with Alexa Fluor 555-Phalloidin (red). Representative confocal images of an epithelial-like colony showing the absence of GFP-LC3B puncta. DAPI (blue) was used as a nuclear counterstaining. Scale bar, 40  $\mu$ m. Data are represented as mean  $\pm$  s.e.m., and one-tailed unpaired Student's t-test was used to compare data sets (\* $P$  < 0.05; \*\* $P$  < 0.01; \*\*\* $P$  < 0.001; \*\*\*\* $P$  < 0.0001).

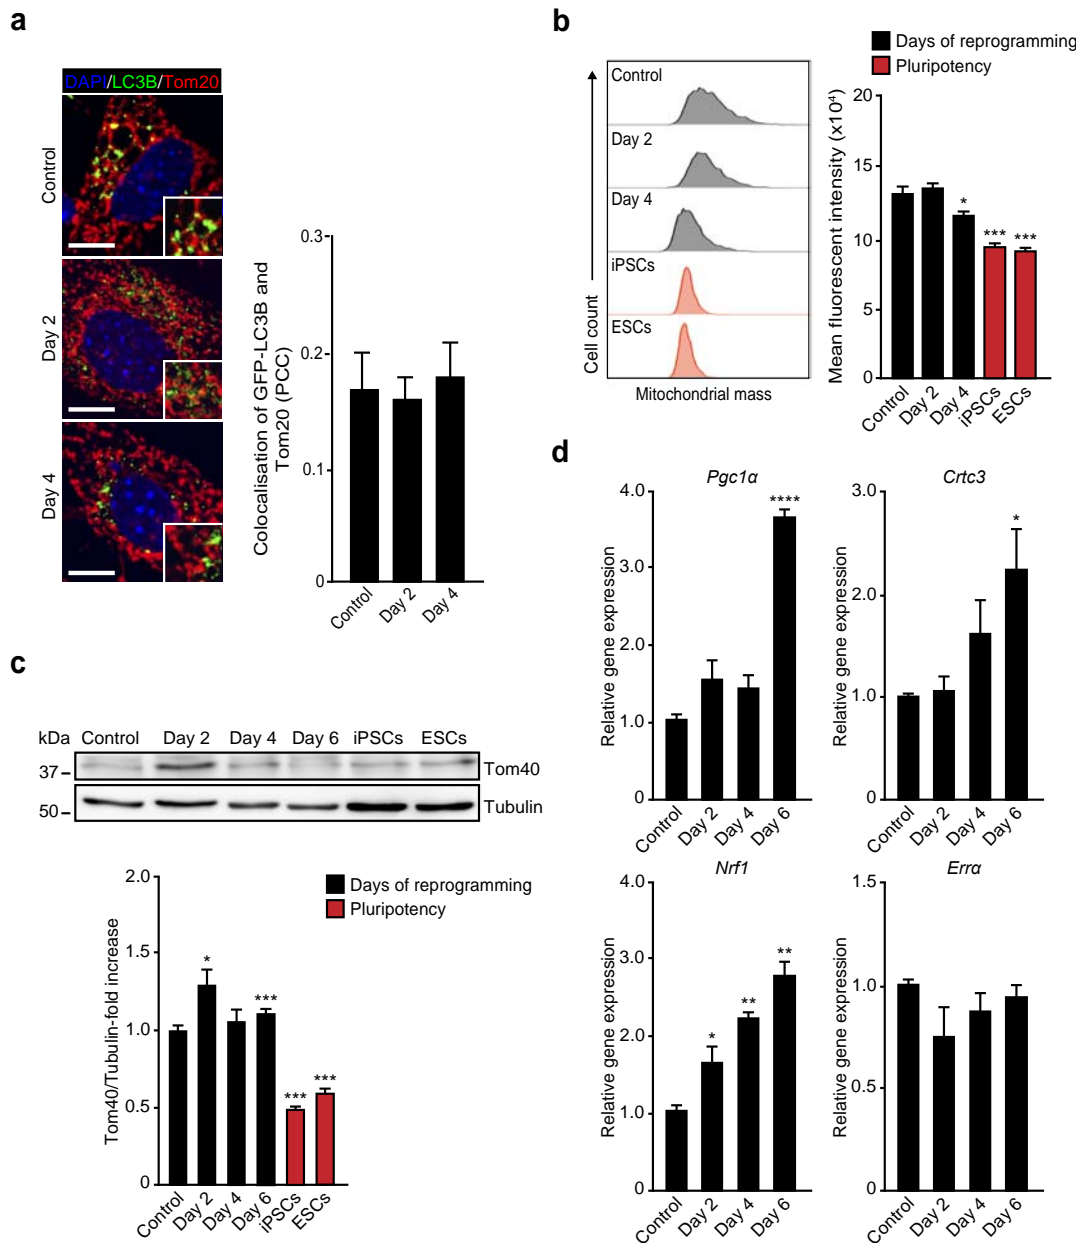

**Supplementary Figure 2. Mitochondrial fission is not associated with mitophagy.** (a) Representative confocal images of MEFs transduced and treated as in Supplementary Fig. 1d that were subjected to immunofluorescence analysis using anti-Tom20 antibody (red) for labelling mitochondria. Insets show a magnification of the pictures. DAPI (blue) was used as a nuclear counterstaining. Scale bars, 12  $\mu$ m. Graph on the right shows the colocalisation of GFP-LC3B with Tom20 assessed by the Pearson correlation coefficient (PCC) of both stainings in the cells before (Control) or at the indicated days after OSKM expression (n = 3). (b) Representative flow cytometry histograms of MEFs stained with mitochondrial membrane potential-independent Mitotracker Green FM for assessing mitochondrial mass before (Control) or at the indicated days after transduction

with OSKM-encoding retroviruses. Pluripotent iPS and ES cells are showed as controls. Right graph shows the quantification of the Mean Fluorescence Intensity of the histograms shown in the left (n = 3). (c) Cells were treated as in (b) and total lysates subjected to immunoblotting analysis using the indicated antibodies to assess mitochondrial mass. Graph on the bottom shows the quantification of the data (n = 3). (d) Total RNA was extracted from mock-infected (control) or OSKM-infected wild type MEFs for the indicated days. The expression of the indicated genes implicated in mitochondrial biogenesis was then assessed by qPCR and represented as relative gene expression normalised to control MEFs (n = 3). Data are represented as mean  $\pm$  s.e.m., and one-tailed unpaired Student's t-test was used to compare data sets (\* $P < 0.05$ ; \*\* $P < 0.01$ ; \*\*\* $P < 0.001$ ; \*\*\*\* $P < 0.0001$ ).

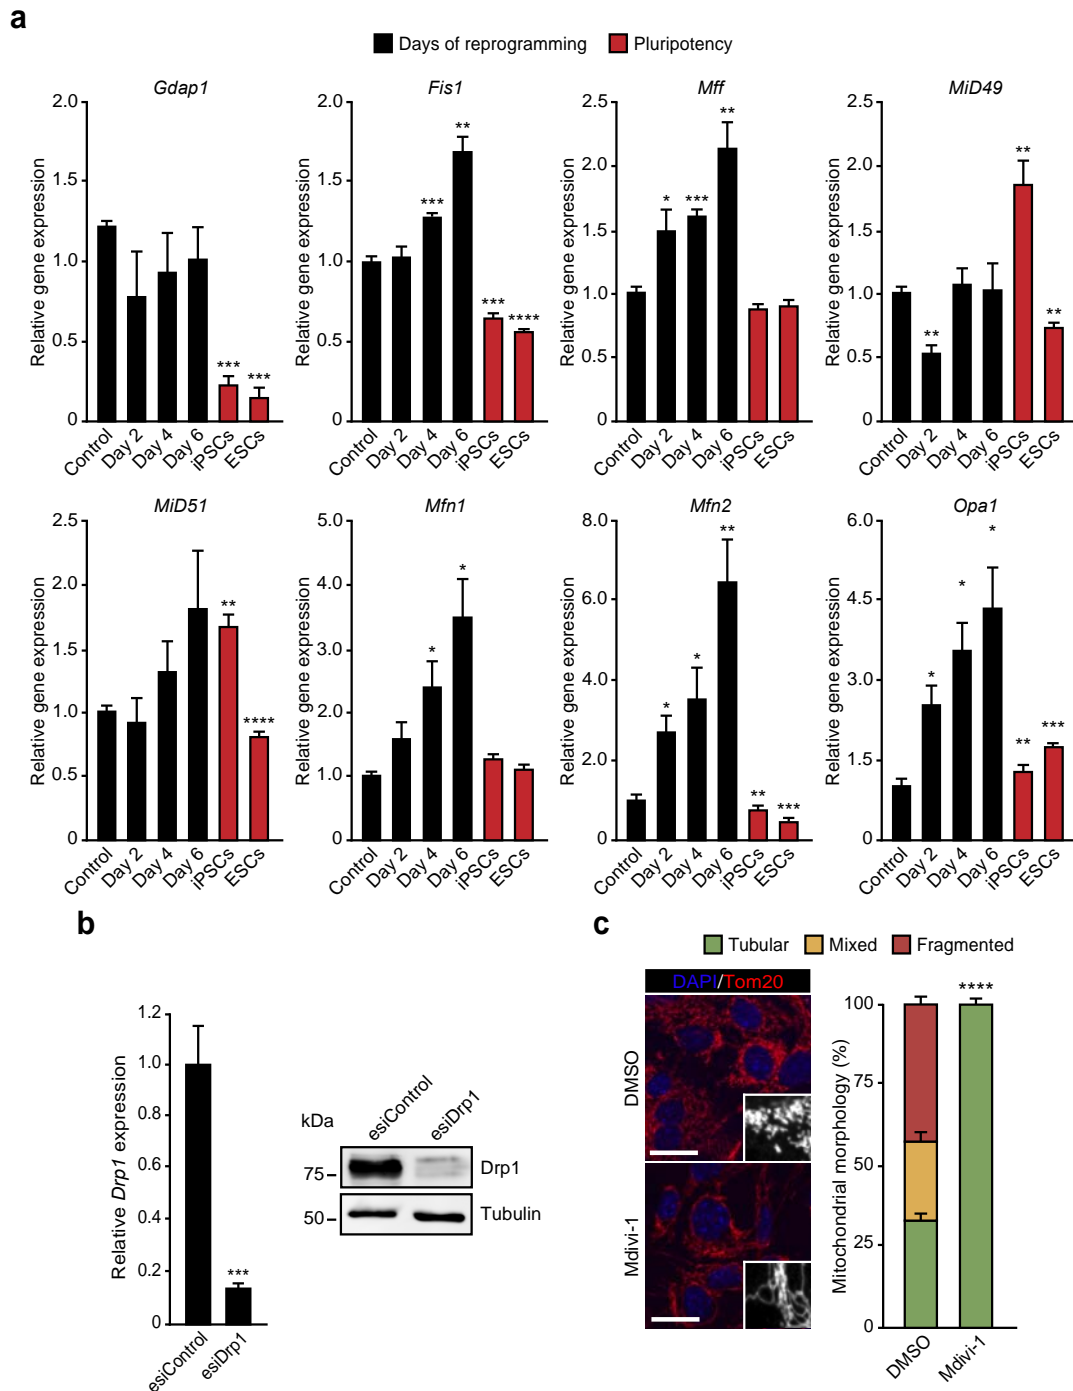

**Supplementary Figure 3. Expression of mitochondrial dynamics regulatory factors.** (a) Total RNA was extracted from mock- (Control) or OSKM-infected wild type MEFs for four days (black bars), or from the indicated pluripotent cells (red bars). The expression of the indicated genes was then assessed by qPCR and represented as relative gene expression normalised to control MEFs (n = 3). (b) Graph on the left shows the expression of *Drp1* assessed by qPCR in MEFs four days after being transduced with the OSKM factors in presence of esiRNAs

targeting GFP as control (esiControl) or mouse *Drp1* (esiDrp1) (n = 3). Panels on the right show the assessment of Drp1 and Tubulin proteins expression by immunoblotting using specific antibodies in cells treated as before. (c) Representative confocal images of MEFs expressing the reprogramming factors during four days in the presence of Mdivi-1 (50  $\mu$ M) and stained with anti-Tom20 antibody (red) to assess the indicated mitochondrial morphologies. Insets show a black and white magnification of the pictures. DAPI (blue) was used as a nuclear counterstaining. Scale bars, 24  $\mu$ m. Graphs on the right show the quantification of the indicated mitochondrial morphologies observed in cells treated as above (n = 3). Data are represented as mean  $\pm$  s.e.m., and one-tailed unpaired Student's t-test was used to compare data sets (\* $P$  < 0.05; \*\* $P$  < 0.01; \*\*\* $P$  < 0.001; \*\*\*\* $P$  < 0.0001).

Prieto et al., Supplementary Figure 4

**a**

| Protein identification |                                |        |            |          |                   |
|------------------------|--------------------------------|--------|------------|----------|-------------------|
| Fraction               | Identified protein             | Unused | %Cov       | %Cov(95) | N° Peptides (95%) |
| Cytosolic              | Dynamin-1-like protein (DNM1L) | 405,6  | 97,8299975 | 86,8200  | 823               |
| Mitochondrial          | Dynamin-1-like protein (DNM1L) | 105,39 | 81,129998  | 72,1000  | 115               |

| Peptide modifications |                  |                                                                      |            |          |
|-----------------------|------------------|----------------------------------------------------------------------|------------|----------|
| Fraction              | Modified residue | Sequence                                                             | Confidence | dMass    |
| Mitochondrial         | pSer579          | SKPIPI <del>S</del> PIMPAS <del>P</del> QK                           | 99,00      | 0,00369  |
| Cytosolic             | pSer330, pThr338 | DDK <del>S</del> SATLLQLIT <del>T</del> KFATEYCN <del>T</del> IEGTAK | 97,94      | 0,00737  |
| Cytosolic             | pSer647          | DTLQ <del>S</del> SELVGLYKSSLLDDLLTESEDMAQR                          | 90,21      | 0,05967  |
| Cytosolic             | pSer175          | FIS <del>N</del> PNSIILAVTAANTDMATSEALK                              | 99,00      | 0,03330  |
| Cytosolic             | pSer136          | GVSPEPIHLKIF <del>S</del> PNVVNLTLVDLPGMTK                           | 99,00      | 0,03157  |
| Cytosolic             | pSer450          | I <del>I</del> QHCSNYSTQELLR                                         | 99,00      | 0,02359  |
| Cytosolic             | pThr479          | LPV <del>T</del> NEMVHNLVAIELAYINTK                                  | 99,00      | 0,03727  |
| Cytosolic             | pSer71, pThr78   | QLVHV <del>S</del> QEDK <del>R</del> TTGEENGVEAE <del>E</del> WGK    | 99,00      | -0,01278 |
| Cytosolic             | pSer175          | RFIS <del>N</del> PNSIILAVTAANTDMATSEALK                             | 99,00      | 0,03811  |
| Cytosolic             | pSer71           | RPLILQLVHV <del>S</del> QEDK                                         | 99,00      | 0,00315  |
| Cytosolic             | pSer579          | SKPIPIPI <del>S</del> PQK <del>G</del> HAVNLLDVPV <del>P</del> VAR   | 99,00      | 0,00072  |
| Cytosolic             | pSer579          | SKPIPIPI <del>S</del> PQK                                            | 99,00      | 0,00696  |
| Cytosolic             | pSer136          | SPEPIHLKIF <del>S</del> PNVVNLTLVDLPGMTK                             | 99,00      | 0,05696  |
| Cytosolic             | pSer656          | <del>S</del> SLLDDLLTESEDMAQR                                        | 99,00      | 0,03261  |
| Cytosolic             | pSer616          | <del>S</del> YFLIVR                                                  | 99,00      | 0,01953  |
| Cytosolic             | pSer656, pSer657 | VGQLYK <del>S</del> SLLDDLLTESEDMAQR                                 | 97,38      | 0,07306  |

**b**

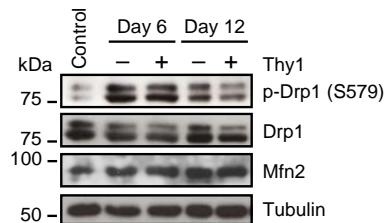

**Supplementary Figure 4. Drp1 post-translational modifications in ES cells.**

(a) Summary of the phosphorylated residues found in cytosolic or mitochondria-associated Drp1 in ES cells by LC-MS/MS. Upper table shows the protein identification in both fractions sorted by Unused ProtScore. Unused, assessment of the protein confidence parameter for the indicated protein, calculated from the peptide confidence for peptides from the spectra that were not completely “used” already by the higher scoring-winning proteins; %Cov (coverage), percentage of matching amino acids from identified peptides, which showed a confidence greater than 0, divided by the total number of amino acids in the sequence; %Cov(95%), the percentage of matching amino acids from identified proteins that showed a

confidence  $\geq 95\%$ , divided by the total number of amino acids in the sequence. Lower table shows the details of the identified peptides in both subcellular fractions. Confidence, the confidence for the peptide identification, expressed as percentage; dMass, the mass difference between molecular weight of the precursor and the theoretical molecular weight of the matching peptide sequence. **(b)** MEFs were transduced, sorted as in Figure 2b into Thy1-positive and -negative cell populations at day 4 post-transduction and cultured in iPS cell medium. At the indicated days, total lysates from the different cell populations were subjected to immunoblotting analysis using the indicated antibodies. A representative immunoblot out of two independent experiments is shown.



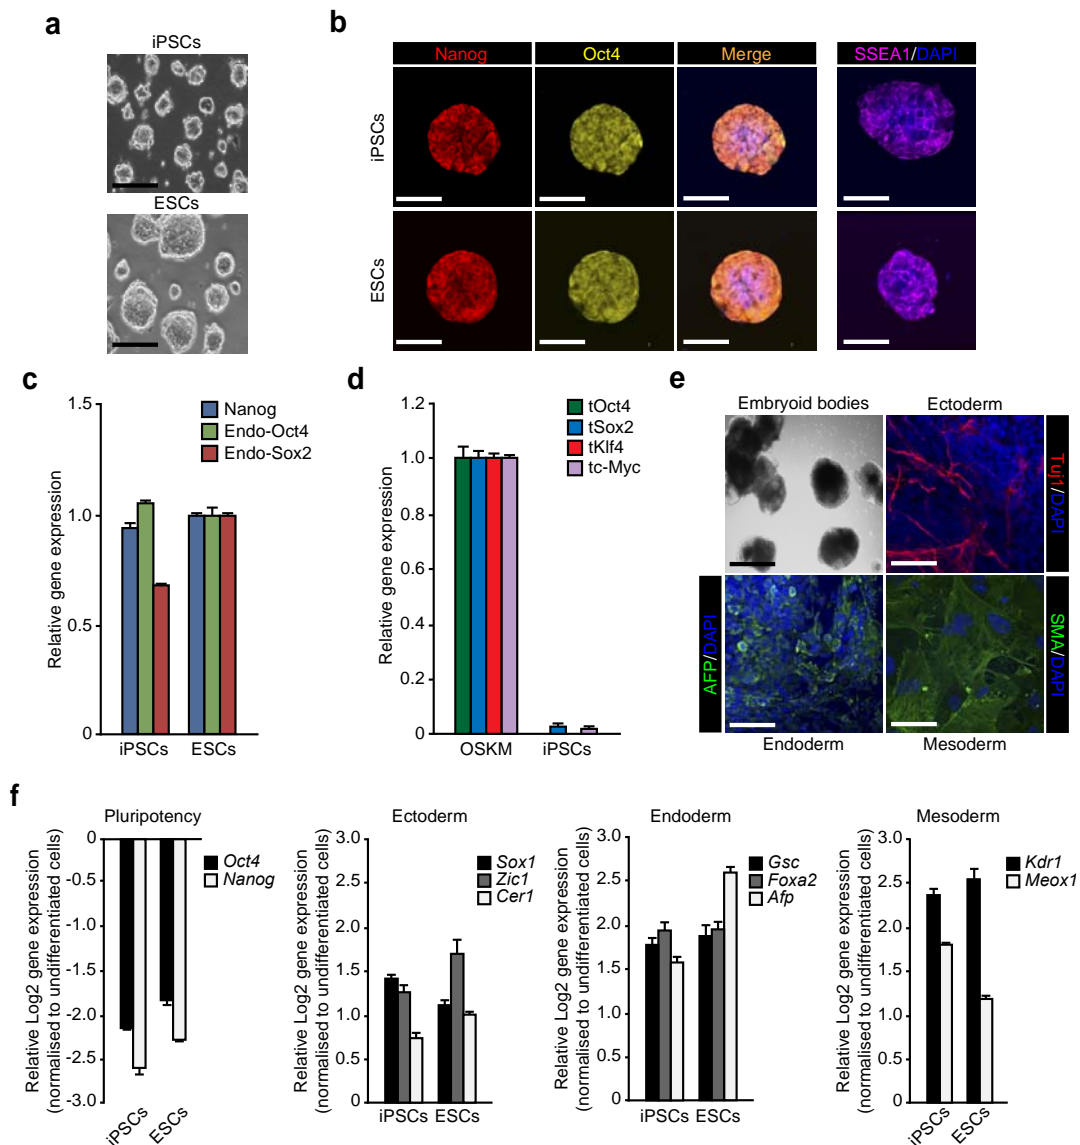

**Supplementary Figure 5. Molecular and functional characterisation of wild type iPS cells.** (a) A representative iPS cell clone (iPSCs) or the E14Tg2a ES cell line (ESCs) were photographed. Scale bar, 130  $\mu$ m. (b) Pluripotent cells were subjected to IF staining with the indicated antibodies, using DAPI (blue) as a nuclear counterstaining. Scale bar, 30  $\mu$ m. IF images show different fields compared with phase pictures. (c, d) Total RNA was extracted from the indicated pluripotent cells and expression of (c) pluripotency markers or (d) exogenous OSKM cDNAs was assessed by qPCR and represented as relative gene expression normalised to undifferentiated ES cells in (c) or OSKM-infected cells (OSKM) in (d). (e) iPS cell clone was subjected to EB differentiation and photographed 7 days after (top panel). Scale bar, 500  $\mu$ m. EBs were then seeded and 2 days later cells were subjected to IF with the indicated antibodies, using DAPI (blue) as a nuclear counterstaining (lower panels). Scale bar, 40  $\mu$ m. (f) Total RNA was extracted from 7 days old EBs and the expression of pluripotency, ectoderm, endoderm or

mesoderm markers was assessed by qPCR and represented as relative gene expression normalised to undifferentiated ES cells. Data are represented as mean  $\pm$  s.e.m. (n = 3).

Prieto et al., Supplementary Figure 6

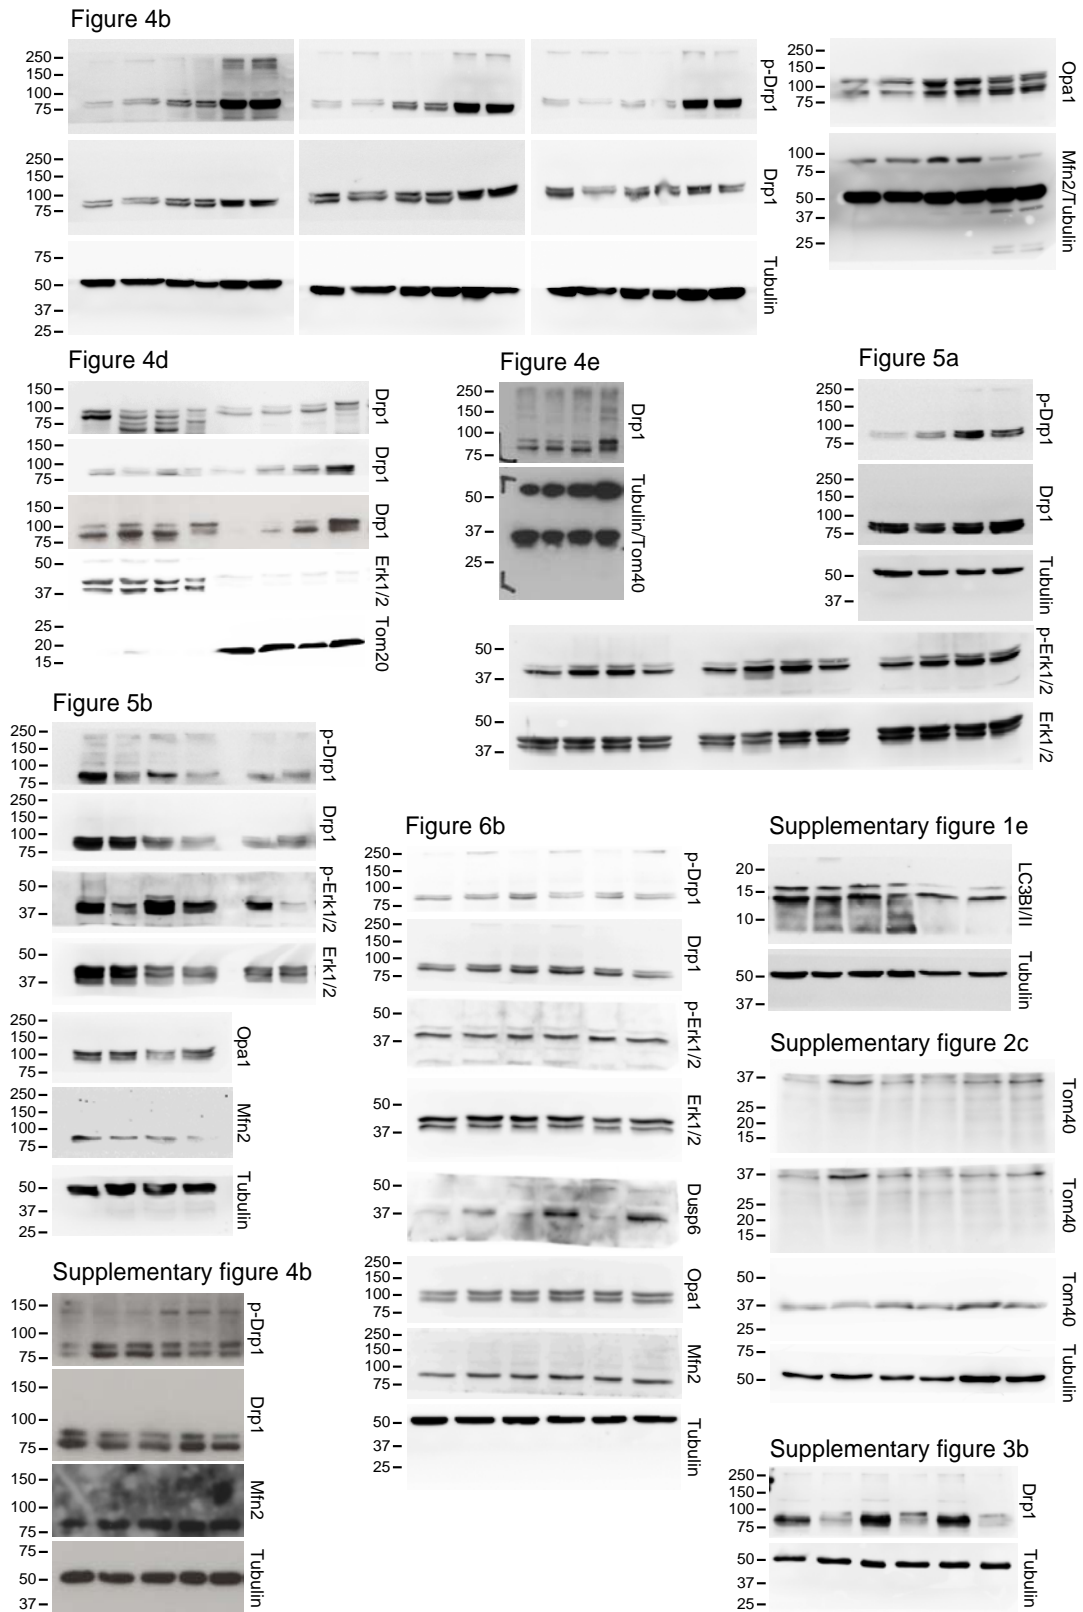

Supplementary Figure 6. Uncropped blots.

**SUPPLEMENTARY TABLES**

**Prieto et al., Supplementary Table 1**

| <b>Antigen</b>              | <b>Host</b> | <b>Company</b>    | <b>Reference</b> | <b>Dilution and applications</b> |
|-----------------------------|-------------|-------------------|------------------|----------------------------------|
| Alpha-fetoprotein           | Rabbit      | Abcam             | ab46799          | 1:100 (IF)                       |
| $\alpha$ -Tubulin           | Mouse       | SCBT              | sc-32293         | 1:5000 (WB)                      |
| $\beta$ III-Tubulin (Tuj1)  | Rabbit      | Covance           | MRB-435P         | 1:1000 (IF)                      |
| Drp1                        | Rabbit      | CST               | #8570            | 1:1000 (WB); 1/50 (IF)           |
| p-Drp1 (Ser616)             | Rabbit      | CST               | #3455            | 1:1000 (WB)                      |
| Erk1/2                      | Rabbit      | CST               | #9102            | 1:1000 (WB)                      |
| p-Erk1/2                    | Mouse       | CST               | #9106            | 1:2000 (WB)                      |
| Dusp6                       | Rabbit      | Dr. R. Pulido Lab | in-house         | 1:1000 (WB)                      |
| LC3B                        | Rabbit      | CST               | #2775            | 1:1000 (WB)                      |
| Mfn2                        | Rabbit      | Sigma-Aldrich     | AV42420          | 1:1000 (WB)                      |
| Nanog                       | Rabbit      | Cosmo Bio Co.     | RCAB0001P        | 1:100 (IF); 1:1000 (WB)          |
| Oct4                        | Mouse       | SCBT              | sc-5279          | 1:50 (IF)                        |
| Opa1                        | Mouse       | BD                | # 612606         | 1:1000 (WB)                      |
| Smooth Muscle Actin         | Mouse       | Abcam             | ab7817           | 1:100 (IF)                       |
| SSEA1                       | Mouse       | SCBT              | sc-21702         | 1:10 (IF and FC)                 |
| Tom-20                      | Rabbit      | SCBT              | sc-11415         | 1:50 (IF); 1:500 (WB)            |
| Tom-40                      | Mouse       | SCBT              | sc-365467        | 1:500 (WB)                       |
| Thy1 (CD90.2)               | Rat         | eBioescience      | 14-0903-81       | 1:400 (IF, FC)                   |
| Rat IgG2b K Isotype Control | Rat         | eBioescience      | 16-4031-81       | 1:400 (FC)                       |

**Supplementary Table 1. Primary antibodies used in this study.** SCBT, Santa Cruz Biotechnology; CST, Cell Signaling Technologies; BD, BD Biosciences; IF, immunofluorescence; FC, flow cytometry; WB, western blot.

Prieto et al., Supplementary Table 2

| Target     | Host   | Conjugate | Company | References | Dilution and applications |
|------------|--------|-----------|---------|------------|---------------------------|
| Mouse IgG  | Donkey | AF@488    | TF      | A-21202    | 1:1000 (IF)               |
| Mouse IgG  | Donkey | AF@555    | TF      | A-31570    | 1:1000 (IF)               |
| Mouse IgG  | Donkey | AF@647    | TF      | A-31571    | 1:1000 (IF)               |
| Mouse IgM  | Donkey | AF@555    | TF      | A-21426    | 1:1000 (IF)               |
| Rabbit IgG | Donkey | AF@488    | TF      | A-21206    | 1:1000 (IF)               |
| Rabbit IgG | Donkey | AF@555    | TF      | A-31572    | 1:1000 (IF)               |
| Rabbit IgG | Donkey | AF@647    | TF      | A-31573    | 1:1000 (IF)               |
| Rat IgG    | Donkey | AF@488    | TF      | A-11006    | 1:1000 (IF, FC)           |
| Mouse IgG  | Goat   | HRP       | TF      | 31432      | 1:5000 (WB)               |
| Rabbit IgG | Goat   | HRP       | TF      | 31460      | 1:5000 (WB)               |

**Supplementary Table 2. Secondary antibodies used in this study.** TF, Thermo Fisher Scientific; SCBT, Santa Cruz Biotechnologies; AF@, AlexaFluor®; HRP, horseradish peroxidase; IF, immunofluorescence; WB, western blot; FC, flow cytometry.

Prieto et al., Supplementary Table 3

| <b>Gene</b>  | <b>Forward primer (5' to 3')</b> | <b>Reverse primer (5' to 3')</b> |
|--------------|----------------------------------|----------------------------------|
| <i>Crtc3</i> | TGACTCACCTGGGGATAAGAAC           | GTGGCACTTGAGGGACGAG              |
| <i>Drp1</i>  | CAGGAATTGTTACGGTTCCTAA           | CCTGAATTAACCTGTCCCGTGA           |
| <i>Dusp6</i> | ATGATGAGGTCTTCAGTCTC             | CAAAATACCCCTTGAGACAC             |
| <i>Errα</i>  | TTCGGCGACTGCAAGCTC               | CACAGCCTCAGCATCTTCAATG           |
| <i>Fis1</i>  | TGTCCAAGAGCACGCAATTTG            | CCTCGCACATACTTTAGAGCCTT          |
| <i>Gapdh</i> | GCACAGTCAAGGCCGAGAAT             | GCCTTCTCCATGGTGGTGAA             |
| <i>Gdap1</i> | TCCTTCAGCTCTCAAAAGGTGC           | GCGCATAAACCAAGGCTCATT            |
| <i>Mff</i>   | ATGCCAGTGTGATAATGCAAGT           | CTCGGCTCTCTCGCTTTG               |
| <i>Mid49</i> | AGCCCACGCCATTCATTC               | TGGAGCCCGTCGTAGAGAG              |
| <i>Mid51</i> | GGTGAGCGCAAAGGGAAGA              | AATGCCCAACATAGCTGCTCC            |
| <i>Mfn1</i>  | ATGGCAGAAACGGTATCTCCA            | CTCGGATGCTATTCGATCAAGTT          |
| <i>Mfn2</i>  | TGACCTGAATTGTGACAAGCTG           | AGACTGACTGCCGTATCTGGT            |
| <i>Nrf1</i>  | CCACATTACAGGGCGGTGAA             | AGTGGCTCCCTGTTGCATCT             |
| <i>Opa1</i>  | ACAGCAAATTCAGAGCACGA             | TTGCGCTTCTGTTGGGCAT              |
| <i>Pgc1α</i> | CGGAAATCATATCCAACCAG             | TGAGGACCGCTAGCAAGTTTG            |

**Supplementary Table 3. Oligonucleotides used in this study.**

Prieto et al., Supplementary Table 4

| Gene         | Catalogue no./Sequence       | Assay                                                                     |
|--------------|------------------------------|---------------------------------------------------------------------------|
| <i>Afp</i>   | Mm00431715_m1                | TaqMan gene expression assay                                              |
| <i>Cer1</i>  | Mm03024044_m1                | TaqMan gene expression assay                                              |
| <i>Foxa2</i> | Mm00839704_mH                | TaqMan gene expression assay                                              |
| <i>Gapdh</i> | Mm99999915_g1                | TaqMan gene expression assay                                              |
| <i>Gsc</i>   | Mm00650681_g1                | TaqMan gene expression assay                                              |
| <i>Kdr1</i>  | Mm01222421_m1                | TaqMan gene expression assay                                              |
| <i>Meox1</i> | Mm00440285_m1                | TaqMan gene expression assay                                              |
| <i>Nanog</i> | Mm02384862_g1                | TaqMan gene expression assay                                              |
| <i>Oct4</i>  | Mm00658129_gH                | TaqMan gene expression assay                                              |
| <i>Sox1</i>  | Mm00486299_s1                | TaqMan gene expression assay                                              |
| <i>Sox2</i>  | Mm03053810_S1                | TaqMan gene expression assay                                              |
| <i>Zic1</i>  | Mm00656094_m1                | TaqMan gene expression assay                                              |
| tOct4-F      | TGGTACGGGAAATCACAAGTTTGTA    | Custom TaqMan gene expression assay for retroviral transgene <sup>1</sup> |
| tOct4-R      | GGTGAGAAGCGAAGTCTGAAG        |                                                                           |
| tOct4-probe  | FAM-CACCTTCCCATGGCTG-MGB     |                                                                           |
| tSox2-F      | TGGTACGGGAAATCACAAGTTTGTA    | Custom TaqMan gene expression assay for retroviral transgene <sup>1</sup> |
| tSox2-R      | GCCCGGCGGCTTCA               |                                                                           |
| tSox2-probe  | FAM-CTCCGTCTCCATCATGTTAT-MGB |                                                                           |
| tKlf4-F      | TGGTACGGGAAATCACAAGTTTGTA    | Custom TaqMan gene expression assay for retroviral transgene <sup>1</sup> |
| tKlf4-R      | GAGCAGAGCGTCGCTGA            |                                                                           |
| tKlf4-probe  | FAM-CCCCTTACCATGGCTG-MGB     |                                                                           |
| tc-Myc-F     | TGGTACGGGAAATCACAAGTTTGTA    | Custom TaqMan gene expression assay for retroviral transgene <sup>1</sup> |
| tc-Myc-R     | GGTCATAGTTCCTGTTGGTGAAGTT    |                                                                           |
| tc-Myc-probe | FAM-CCCTTACCATGCCCC-MGB      |                                                                           |

**Supplementary Table 4. Taqman probes used in this study.** F, forward primer; R, reverse primer; probe, FAM-labelled fluorogenic probe designed for each transgene<sup>1</sup>. t-*geneX*, reprogramming factor cloned in pMX retroviral vector.

#### SUPPLEMENTARY REFERENCES

1. Theunissen T.W. *et al.* Nanog overcomes reprogramming barriers and induces pluripotency in minimal conditions. *Curr. Biol.* **21**, 65-71 (2011).
